# Supplementary material for: Investigating individual and social behaviour of the Northern bald ibis (Geronticus eremita): behavioural variety and welfare
Source: PeerJ. 2018 Sep 4;6:e5436. doi: 10.7717/peerj.5436 (PMC6128256; doi:10.7717/peerj.5436)
Supplement: Supplemental Information 1 — Durations of individual and social behaviours per subject. The BVI sheet reports the number of behaviuoral items performed by each subject. [file peerj-06-5436-s001.xlsx]

## Sheet: IND, SOC, OUT SIGHT
CLASSES - INDIVIDUAL, SOCIAL, OUT OF SIGHT
Subject	Age	Individual b.	Social b.	Out of sight
CN verde	Adult	10461	290	998
CW rosso	Adult	10616	589	417
CX verde	Juvenile	10278	1471	62
FA rosso	Adult	10392	806	637
GA verde	Juvenile	10543	1027	193
HZ verde	Juvenile	10099	543	982
RK rosso	Juvenile	11294	350	125
TV verde	Juvenile	11156	169	467
TY verde	Juvenile	10808	859	239
UA rosso	Juvenile	10821	573	292
XP blu	Adult	11075	607	181
YK blu	Adult	10914	660	218
YV rosso	Adult	10724	885	79
YZ verde	Adult	11216	460	222
INDIVIDUAL BEHAVIOURS
	Age	Attentive	Comfort b.	Exploration	Flight	Locomotion	Maintenance	Manipulation	Observation	Resting
CN verde	Adult	157	3225	1868	319	1142	663	598	1330	1410
CW rosso	Adult	197	3357	999	320	699	866	422	2594	1540
CX verde	Juvenile	403	2711	2645	510	1286	738	236	2018	817
FA rosso	Adult	232	2869	1097	521	623	465	419	2096	2145
GA verde	Juvenile	339	2541	3087	695	1144	547	615	1511	423
HZ verde	Juvenile	482	3755	2406	518	427	879	298	1774	596
RK rosso	Juvenile	559	2519	2485	690	546	573	633	2011	1196
TV verde	Juvenile	206	2121	3066	506	1006	834	589	1369	1425
TY verde	Juvenile	190	2404	2834	478	1010	720	644	1741	1015
UA rosso	Juvenile	224	1700	3985	346	1027	551	335	1568	1582
XP blu	Adult	68	1178	2107	1135	714	415	1060	1318	2562
YK blu	Adult	369	4384	992	517	493	445	247	1893	1440
YV rosso	Adult	345	4546	542	560	441	710	91	1715	1525
YZ verde	Adult	247	3115	1813	497	786	652	463	2103	1849
SOCIAL BEHAVIOUR
		Affiliative		Agonistic
	Age	Preening soc	Other affiliative	Aggression	Threat/Slight agg.
CN verde	Adult	0	28	0	262
CW rosso	Adult	84	164	0	425
CX verde	Juvenile	0	0	24	145
FA rosso	Adult	856	1078	151	242
GA verde	Juvenile	0	92	131	636
HZ verde	Juvenile	0	184	23	366
RK rosso	Juvenile	0	102	25	480
TV verde	Juvenile	0	121	0	539
TY verde	Juvenile	0	170	195	520
UA rosso	Juvenile	0	61	44	355
XP blu	Adult	81	331	109	366
YK blu	Adult	248	465	214	348
YV rosso	Adult	0	312	29	202
YZ verde	Adult	0	76	0	274

## Sheet: BVI
Subject	Age	Maintenance	Foraging/Expl	Comfort	Social	BVI		N° behav items	M	FE	C	S
CN verde	Adults	5	4	2	2	13		0	0	0	0	0
CW rosso	Adults	5	4	1	3	13		1	0	0	4	0
FA rosso	Adults	5	4	1	4	14		2	0	0	10	4
XP blu	Adults	5	4	1	4	14		3	0	0	0	7
YK blu	Adults	5	4	2	4	15		4	0	14	0	3
YV rosso	Adults	5	4	2	3	14		5	14	0	0	0
YZ verde	Adults	5	4	2	2	13
CX verde	Juveniles	5	4	2	2	13		BVI	5	5	3	4
GA verde	Juveniles	5	4	2	3	14
HZ verde	Juveniles	5	4	2	3	14
RK rosso	Juveniles	5	4	1	3	13
TV verde	Juveniles	5	4	2	2	13
TY verde	Juveniles	5	4	2	3	14
UA rosso	Juveniles	5	4	2	3	14
